# Supplementary material
Source: Springer Nature journal article supplement (https://www.springermedizin.de/resource/supplementary/12889_2013_6411_MOESM1_ESM.pdf/9497862)

1. Facts about HIV and AIDS

2. Prevention Education

3. Community Norms

5. Future Focus

4. Biblical Perspectives

**Cluster Legend**

| Layer | Value        |
|-------|--------------|
| 1     | 3.49 to 3.66 |
| 2     | 3.66 to 3.82 |
| 3     | 3.82 to 3.99 |
| 4     | 3.99 to 4.15 |
| 5     | 4.15 to 4.32 |

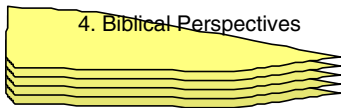

Supplement: MOESM1 [file 9497862]
